# Supplementary material
Source: PubMed Central journal article supplement (PMC4376354)
Supplement: NIHMS669910-supplement-Figure_S1.pdf [file NIHMS669910-supplement-Figure_S1.pdf]

| organism                      | RNA signal:      | Effector: | chromatin/DNA modification:   | Outcome:          |
|-------------------------------|------------------|-----------|-------------------------------|-------------------|
| <i>A. thaliana</i>            | sRNA →           | Ago/Piwi  | ↔ histone H3K9me<br>↔ DNA 5mC | → TGS             |
| <i>S. pombe</i>               | sRNA →           | Ago/Piwi  | ↔ histone H3K9me              | → TGS, CTGS       |
| <i>C. elegans</i>             | sRNA →           | Ago/Piwi  | → histone H3K9me              | → TGS, CTGS       |
| <i>Drosophila</i> (germline)  | sRNA →           | Ago/Piwi  | ↔ histone H3K9me              | → TGS             |
| <i>M. musculus</i> (germline) | sRNA →           | Ago/Piwi  | → histone H3K9me<br>→ DNA 5mC | → TGS             |
| <i>T. thermophila</i>         | sRNA →           | Ago/Piwi  | → histone H3K9me              | → DNA elimination |
| <i>S. pombe, M. musculus</i>  | lncRNA<br>mRNA → | RBD       | → histone H3K9me              | → TGS, CTGS       |

**Supplementary information S1 (figure). Conservation and divergence of RNA silencing pathways.** RNA silencing mechanisms are usually composed of an RNA signal (sRNA or sequence within lncRNA) that recruits an effector protein. For sRNAs, the effector is a member of the conserved Argonaute/Piwi (Ago/Piwi) family of proteins, whereas for lncRNAs it is an RNA-binding protein (RBD). The effector then recruits enzymes that either methylate histone H3 on lysine 9 (H3K9) or cytosine in DNA (5mC) resulting in transcriptional gene silencing (TGS) and in some cases also co-transcriptional gene silencing (CTGS), involving degradation of targeted nascent transcripts. In *S. pombe* and *A. thaliana*, sRNA amplification and the downstream histone or DNA methylation events are interdependent and form self-reinforcing positive feedback loops (denoted by forward and reverse arrows).
